# Supplementary material for: Human ribonuclease 1 serves as a secretory ligand of ephrin A4 receptor and induces breast tumor initiation
Source: PubMed Central journal article supplement (PMC8119676; doi:10.1038/s41467-021-23075-2), 2021-05-13
Supplement: 41467_2021_23075_MOESM1_ESM.pdf [file 41467_2021_23075_MOESM1_ESM.pdf]

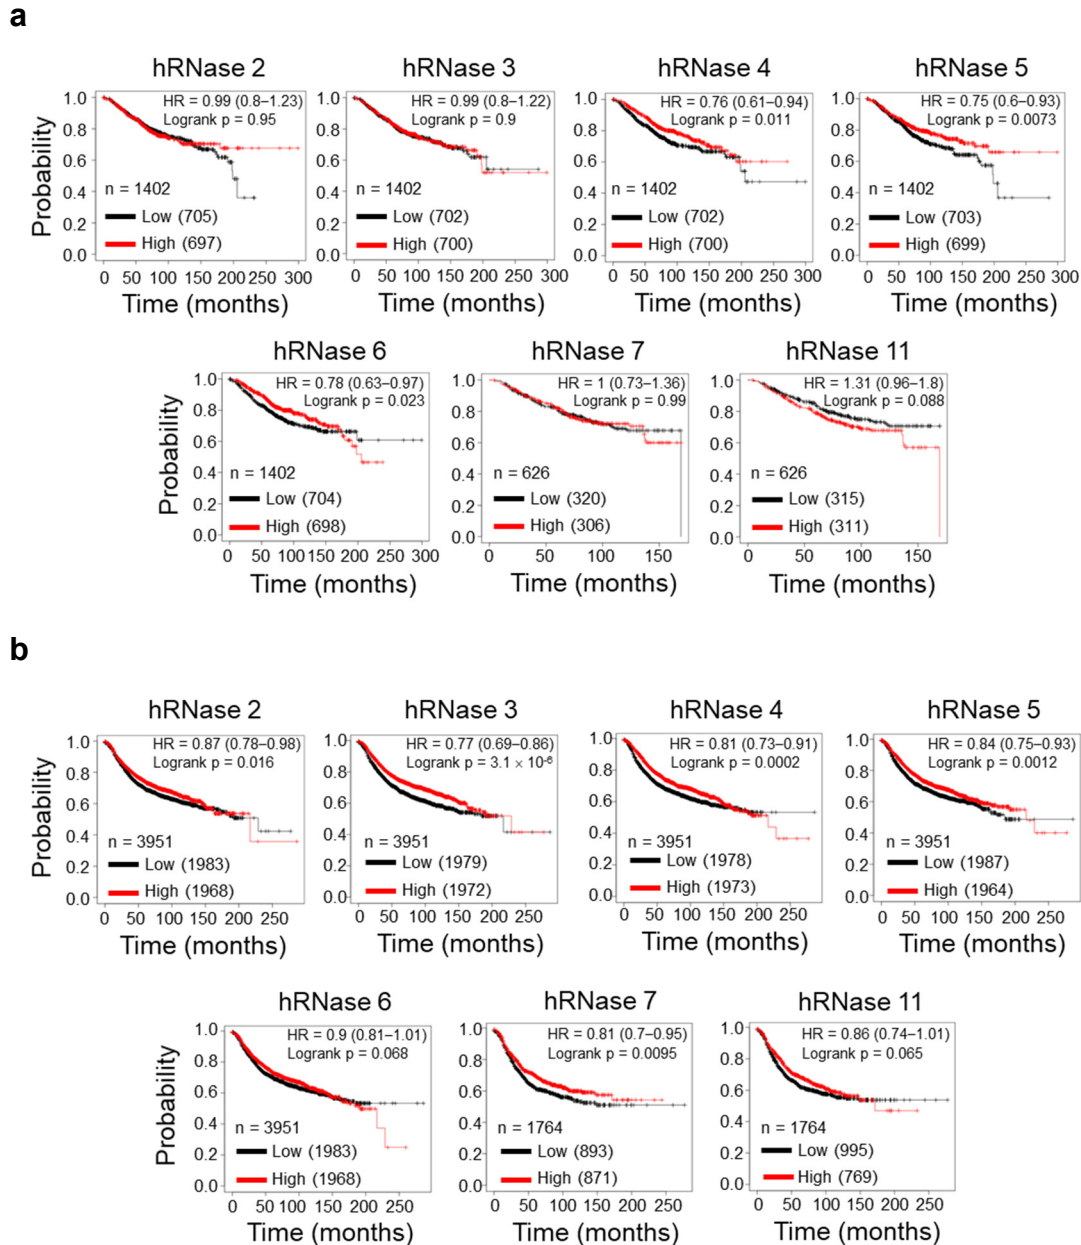

**Supplementary Fig. 1. Survival curve analysis by screening the expression of hRNase family in human cancers. a and b, Prognostic correlation of survival analyses of breast cancer patients with high and low hRNases expression as indicated. Data was analyzed from the overall survival (a; OS) and the relapse free survival (b; RFS). Survival data were analyzed using Kaplan-Meier Plotter [Probe: 206111\_at (hRNase 2); 206851\_at (hRNase 3); 205158\_at (hRNase 4); 205141\_at**

(hRNase 5); 213566\_at (hRNase 6); 234699\_at (hRNase 7); 231603\_at (hRNase 11)]. HR, hazard ratio. All p values are calculated by Log-rank test.

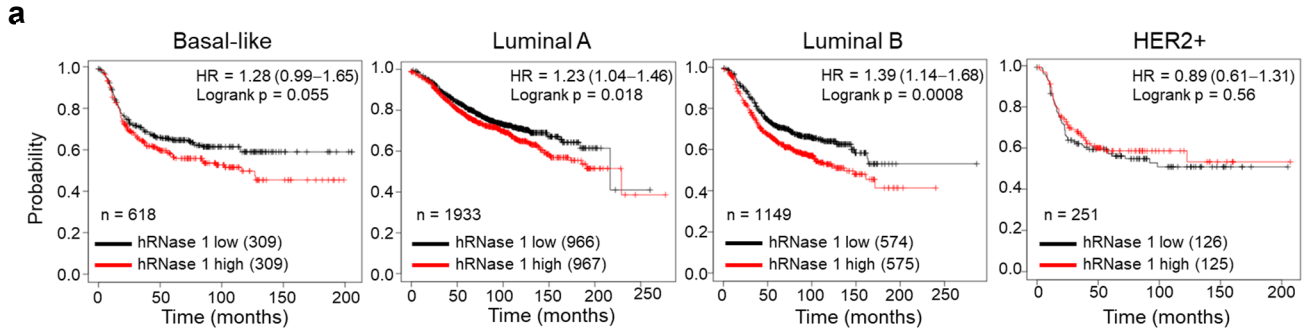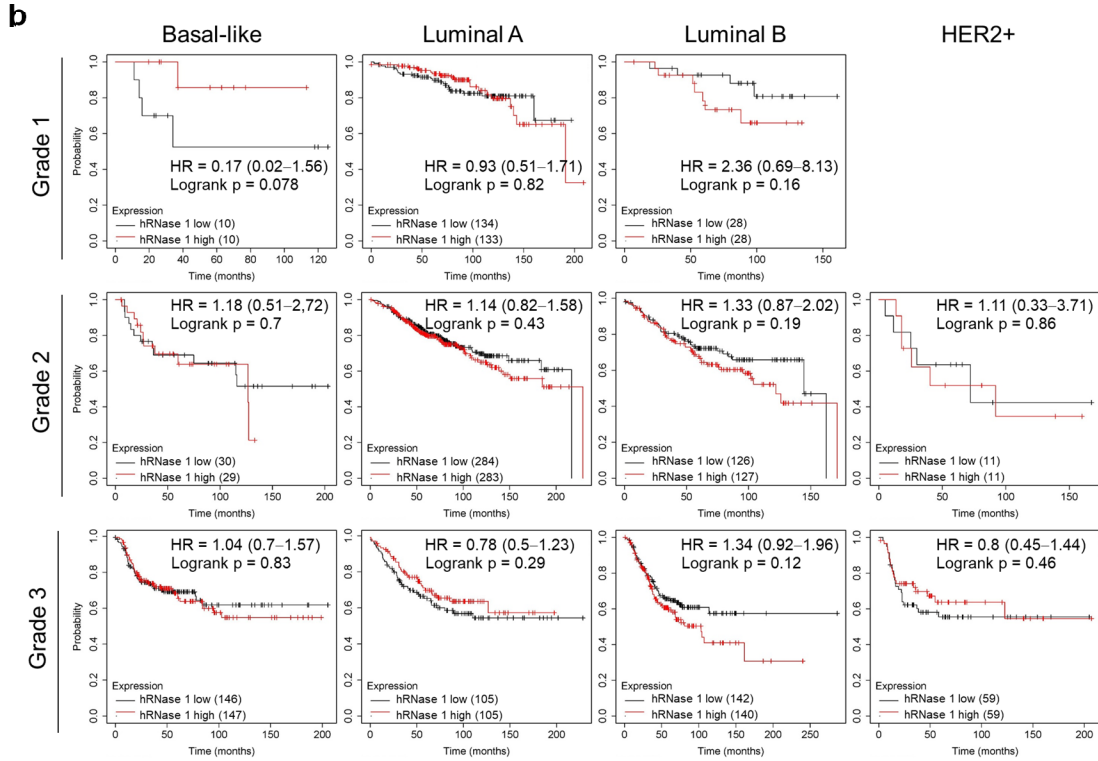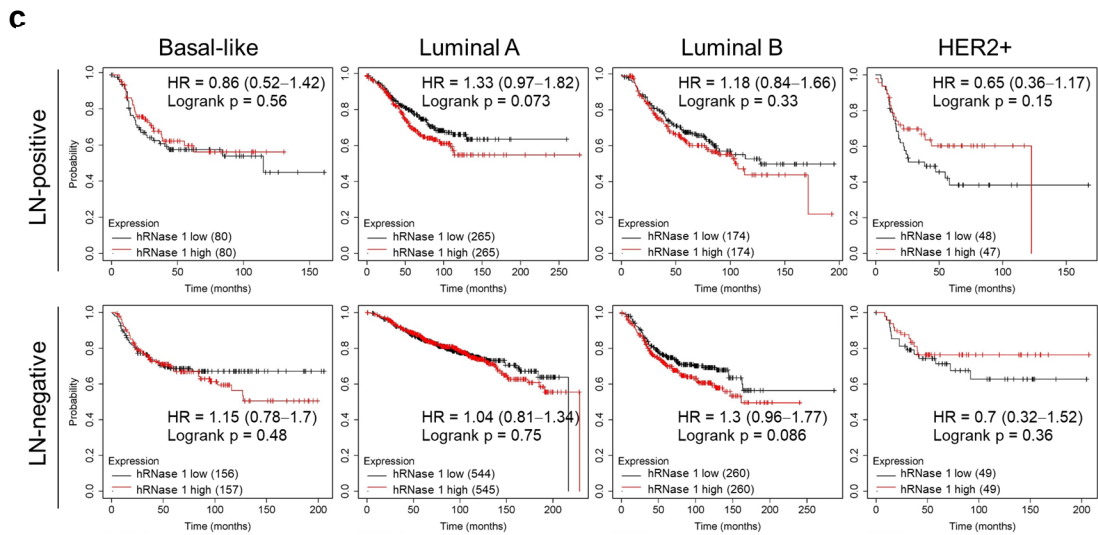

**Supplementary Fig. 2. High hRNase 1 expression correlates with poor patient survival in breast cancer patients with basal-like, luminal A, and luminal B subtypes. a,** Prognostic correlation of the RFS of breast cancer patients in different breast cancer subtypes with different hRNase 1 levels as indicated. **b and c,** Prognostic correlation of the RFS of breast cancer patients with different grades (**b**) and lymph node (LN) statuses (**c**) in different breast cancer subtypes with different hRNase 1 levels as indicated. Data of grade 1 patients with of HER2+ is not provided in the database. All p values are calculated by Log-rank test (**a–c**).

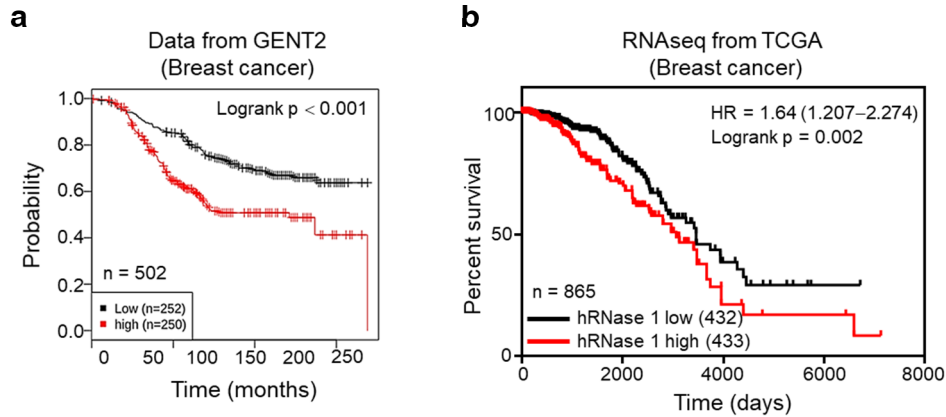

**Supplementary Fig. 3. High hRNase 1 expression correlates with poor patient survival in two other independent databases of patients with breast cancer.** **a**, Prognostic correlation of the OS of breast cancer patients with high and low hRNase 1 expression divided by the median value, analyzed the Kaplan-Meier Plotter from the GENT2 database (<http://gent2.appex.kr/gent2/>). **b**, Prognostic correlation of the OS of breast cancer patients with high and low hRNase 1 expression divided by the median value, analyzed the Kaplan-Meier survival curve from the UCSC Cancer Genome Browser (<http://xena.ucsc.edu/welcome-to-ucsc-xena/>) using the interpreted expression profile of TCGA breast invasive carcinoma by RNA sequencing (dataset ID: TCGA\_BRCA\_exp\_HiSeqV2). Both p values are calculated by Log-rank test (**a**, **b**).

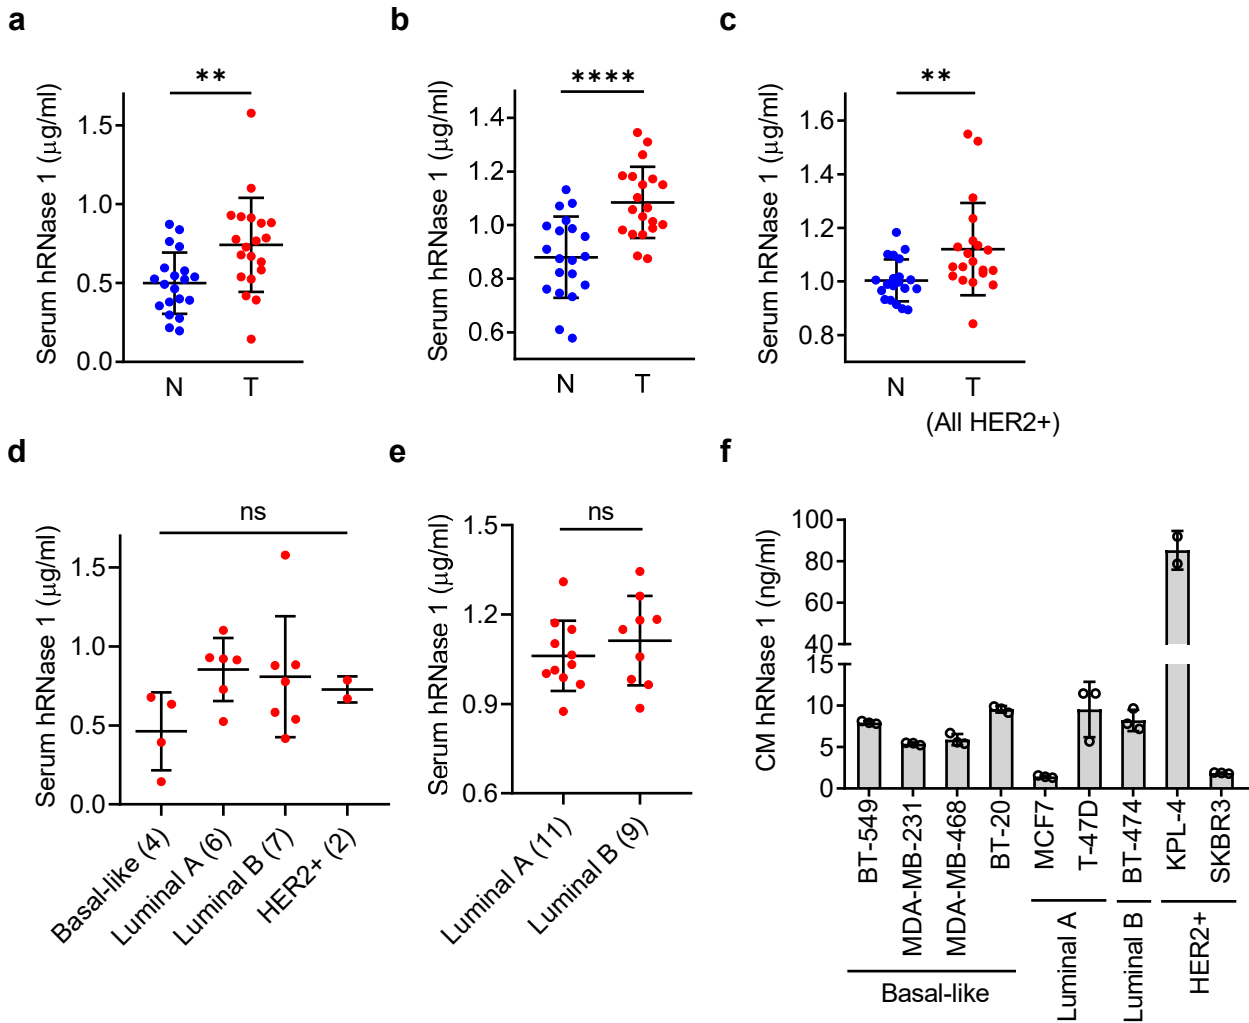

**Supplementary Fig. 4. Serum samples of breast cancer patients show higher hRNase 1 expression than normal individuals. a–c, ELISA of hRNase 1 levels in three independent cohorts of serum samples of breast tumor patients (T; n = 20) compared with noncancerous individuals (N; n = 20). \*\*p = 0.0041, \*\*\*\*p < 0.0001, \*\*p = 0.0090, respectively. All patients in the cohort (c) belong to HER2+ subtype. d, ELISA of hRNase 1 levels in breast tumor serum samples from (a) subdivided into four molecular subtypes, including Basal-like (n = 4), Luminal A (n = 6), Luminal B (n = 7), and HER2+ (n = 2). e, ELISA of hRNase 1 levels in breast tumor serum samples from (b) subdivided into two molecular subtypes, including Luminal A (n = 11) and Luminal B (n**

= 9). **f**, ELISA of hRNase 1 expression in the conditioned medium (CM) of breast cancer cells. Data represent three independent experiments. All error bars represent mean  $\pm$  SD. \*\* $p < 0.01$ , \*\*\*\* $p < 0.0001$ , ns, not significant, two-tailed unpaired t test (**a**, **b**, **c**, **e**), One way ANOVA analysis (**d**). Source data are provided as a Source Data file.

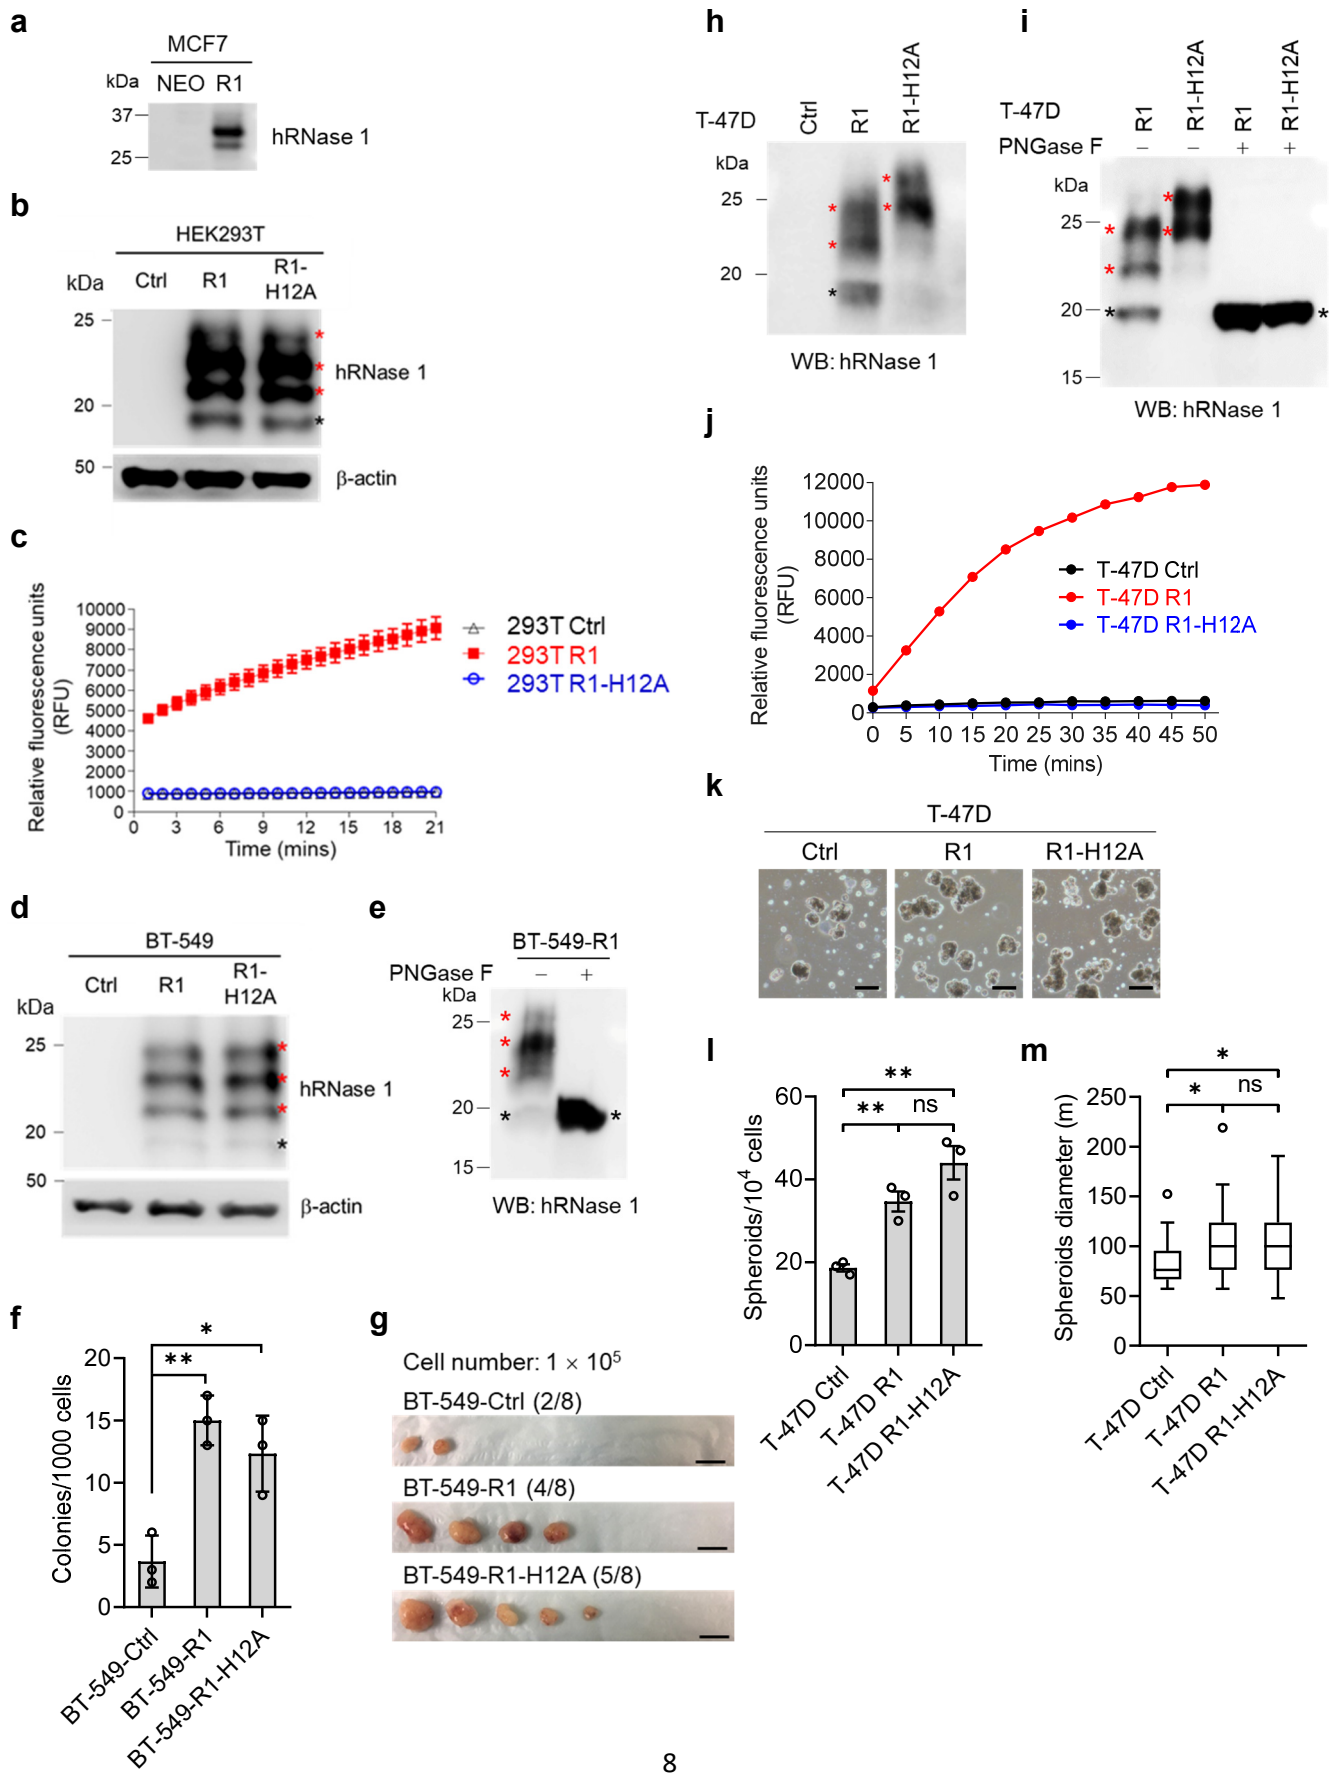



**Supplementary Fig. 5. hRNase 1 increases the sphere-forming ability and enhances the tumor-initiating capability of breast cancer cells independently of its ribonucleolytic activity.**

**a**, WB of secreted proteins from CM in MCF7 control cells (MCF7-NEO) and hRNase 1 expressing MCF7 cells (MCF7-R1) with hRNase 1 antibody. **b**, WB of cell lysates in Flag-tagged hRNase 1 in HEK293T transfected with an empty control vector (Ctrl), R1, and R1-H12A with Flag and  $\beta$ -actin antibodies. **c**, Analysis of RNase enzymatic activity by an RNaseAlert® Lab Test kit in CM collected from HEK293T transfected with the indicated plasmids. Data are representative of two independent experiments in triplicate. Error bars represent mean  $\pm$  SD. **d**, WB of cell lysates in BT-549 stable transfectants expressing empty control (Ctrl), R1, and R1-H12A with Flag and  $\beta$ -actin antibodies. **e**, WB of secreted proteins from CM in BT-549-R1 treated without or with PNGase F. **f**, Quantification of soft agar colony formation assay of cells from **(d)**. Ctrl vs R1, \*\* $p = 0.002$ , Ctrl vs R1-H12A, \* $p = 0.015$ . **g**, Representative images of limiting dilution assay of the indicated BT-549 stable clones ( $1 \times 10^5$ ) from Figure 2g. The number of tumor-forming mice within each group is shown in the parentheses. Bar, 1 cm. **h**, WB of secreted proteins from CM in T-47D stable transfectants expressing empty control (Ctrl), R1, and R1-H12A with hRNase 1 antibody. **i**, WB of secreted proteins from CM in T-47D R1 and T-47D R1-H12A treated without or with PNGase F. **j**, Analysis of RNase enzymatic activity by an RNaseAlert® Lab Test kit in CM collected from **(h)**. **k**, Representative images of primary spheres from **(h)**. Bar, 100  $\mu$ m. **l** and **m**, Quantification of spheroid number (**l**) and diameter (**m**) of spheroid formation assay from **(h)**. **l**, Ctrl vs R1, \*\* $p = 0.0033$ , Ctrl vs R1-H12A, \*\* $p = 0.0036$ . **m**, Ctrl vs R1, \* $p = 0.0296$ , Ctrl vs R1-H12A, \* $p = 0.0497$ . Box plots, including T-47D Ctrl ( $n = 23$ ), T-47D R1 ( $n = 30$ ), and T-47D R1-H12A ( $n = 36$ ), indicate minima (lower end of whisker), maxima (upper end of whisker), median (centre), 25th percentile (bottom of box) and 75th percentile (top of box) as well as outliers

(single points) (**m**). Error bars represent mean  $\pm$  SD (**f**) and mean  $\pm$  SEM (**l**), n = 3 independent experiments (**f**, **l**). \*p < 0.05, \*\*p < 0.01, ns, not significant, two-tailed unpaired t test (**f**, **l**, **m**). Each experiment was repeated a second time with similar results (**a**, **b**, **d**, **e**, **h**, **i**). Antibodies used in WB, hRNase 1 (Sigma-Aldrich, #HPA001140); Flag (Sigma-Aldrich, #F3165);  $\beta$ -actin (Sigma-Aldrich, #A2228). Red asterisk, glycosylated hRNase 1; black asterisk, non-glycosylated hRNase 1. Source data are provided as a Source Data file.

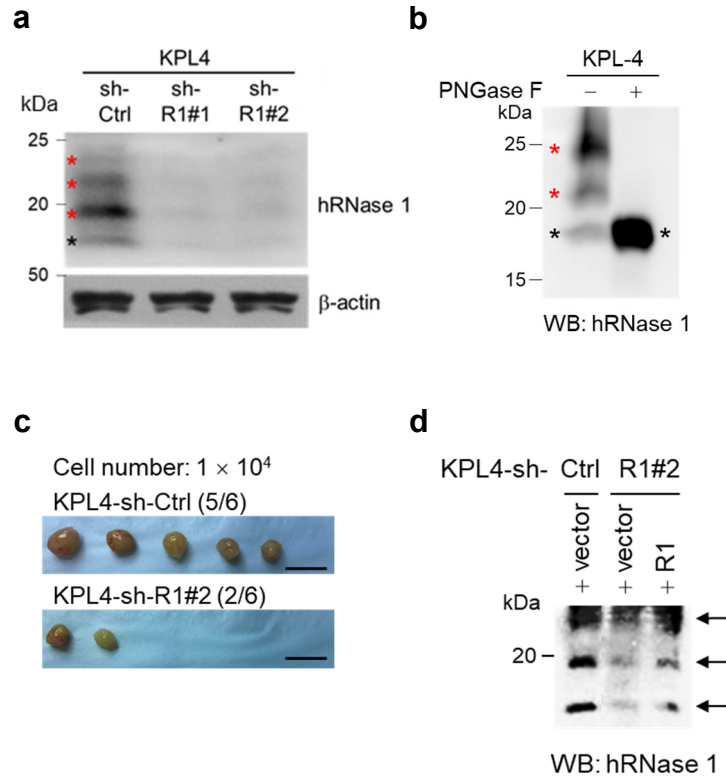

**Supplementary Fig. 6. Silencing hRNase 1 decreases the tumor-initiating capability in KPL4 cells.** **a**, WB of cell lysates in KPL4 stable transfectants knocking down hRNase 1 and empty control with hRNase 1 and  $\beta$ -actin antibodies. **b**, WB of secreted proteins from CM in KPL4 treated without or with PNGase F. **c**, Representative images of limiting dilution assay of the indicated KPL4 stable clones ( $1 \times 10^4$ ) from Figure 2j. The number of tumor-forming mice within each group is shown in the parentheses. Bar, 1 cm. **d**, WB of secreted proteins from CM in the reconstitution of vector control or hRNase 1 in hRNase 1-knockdown KPL4 (KPL4-sh-R1#2) and control cells (KPL4-sh-Ctrl). Each experiment was repeated a second time with similar results (**a**, **b**, **d**). Antibodies used in WB, hRNase 1 (Sigma-Aldrich, #HPA001140);  $\beta$ -actin (Sigma-Aldrich, #A2228). Red asterisk, glycosylated hRNase 1; black asterisk, non-glycosylated hRNase 1. Source data are provided as a Source Data file.

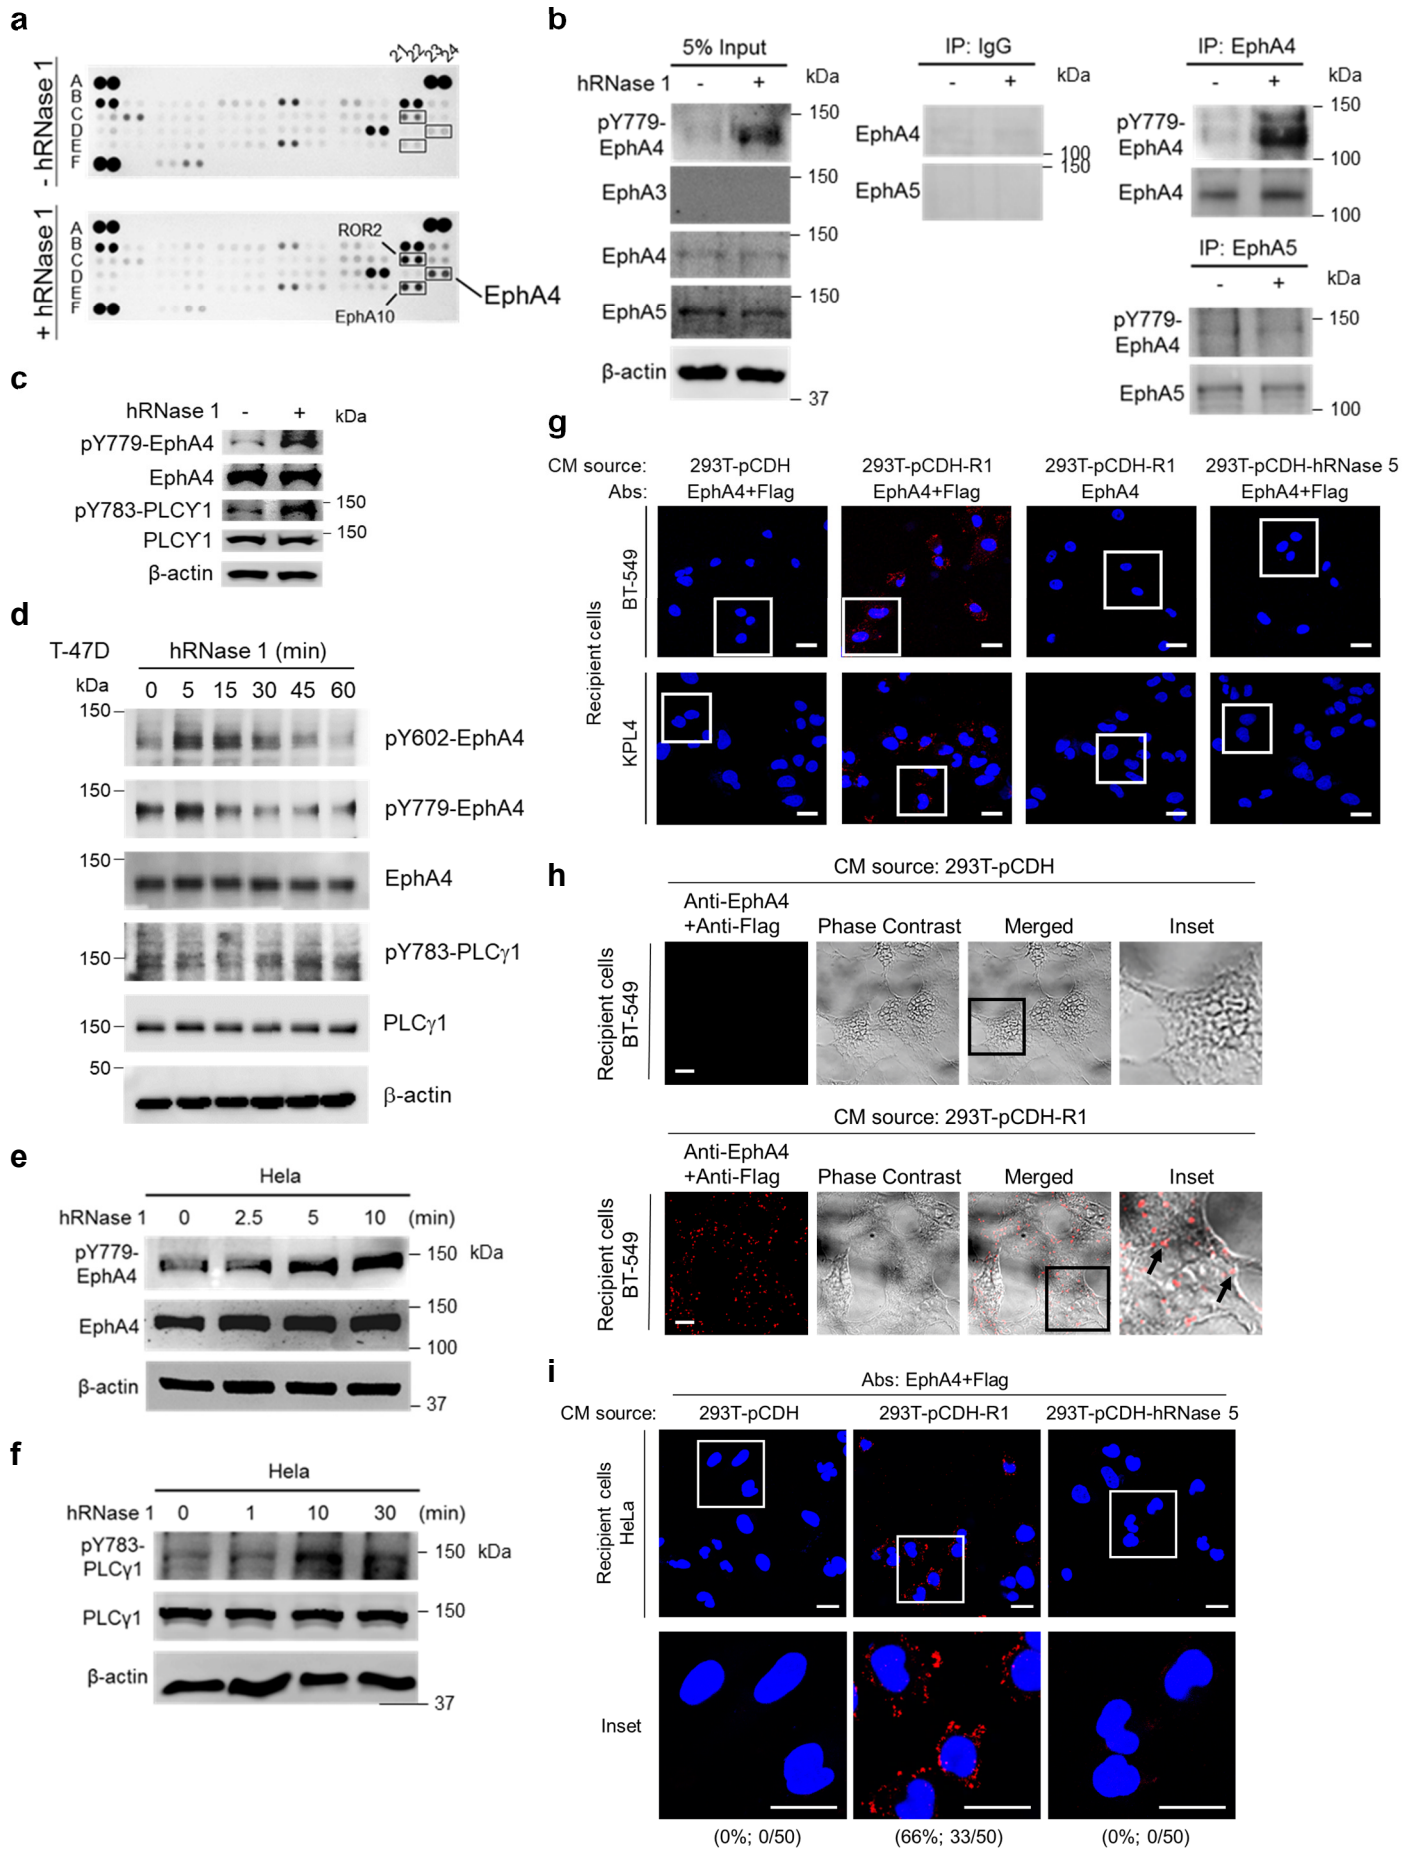

**Supplementary Fig. 7. hRNase 1 stimulates EphA4 signaling and interacts with EphA4 in several cancer cell lines.** **a**, Human phospho-RTK antibody array analysis of BT-549 cells treated with or without recombinant hRNase 1 protein purified from HEK293 cells (1  $\mu\text{g/ml}$ ) for 30 min after serum starvation for 3 hr. Three pairs of positive signals in duplicate coordinates (- hRNase 1 comparing to + hRNase 1) are shown in EphA4 (D23/D24), EphA10 (E21/E22), and ROR2 (C21/C22). **b**, Immunoprecipitation (IP) of BT-549 cells treated with or without 1  $\mu\text{g/ml}$  hRNase 1 for 30 min, followed by WB with the indicated antibodies. Immunoglobulin G (IgG) was used as a control for IP. **c**, WB of BT-549 cells treated with or without hRNase 1 for 30 min with the indicated antibodies. **d**, WB of T-47D cells treated with or without hRNase 1 at various time points with the indicated antibodies. **e** and **f**, WB of pY779-EphA4 and EphA4 (**e**) as well as pY783-PLC $\gamma$ 1 and PLC $\gamma$ 1 (**f**) in HeLa cells treated with hRNase 1 (1  $\mu\text{g/ml}$ ) at different time points as indicated. **g**, Duolink *in situ* proximity ligation assay (PLA) of BT-549 and KPL4 cells, treated with CM collected from 293T-pCDH, 293T-pCDH-R1, or 293T-pCDH-hRNase 5 for 30 min, and stained with EphA4 only or EphA4 plus Flag antibodies as indicated. Insets for Figure 3f, BT-549, enlargements of the boxed areas at 9 $\times$  magnification; KPL4, enlargements of the boxed areas at 12.25 $\times$  magnification. Bar, 25  $\mu\text{m}$ . **h**, Duolink *in situ* PLA of BT-549 cells, treated with CM collected from 293T-pCDH or 293T-pCDH-R1 for 30 min, and stained with EphA4 and Flag antibodies. Arrows in the insets, red dots, positive Duolink *in situ* signals. Insets, enlargements of the boxed areas (6 $\times$  magnification). Bar, 10  $\mu\text{m}$ . **i**, Duolink *in situ* PLA of HeLa cells, treated with CM collected from 293T-pCDH, 293T-pCDH-R1, or 293T-pCDH-hRNase 5 for 30 min, and stained with EphA4 and Flag antibodies. Inset, 9 $\times$  magnification. Bar, 25  $\mu\text{m}$ . The quantified results in the parentheses showing the percentage of cells with positive PLA signals calculated

from a pool of 50 cells. Each experiment was repeated an additional time with similar results (**a–i**).

Source data are provided as a Source Data file.

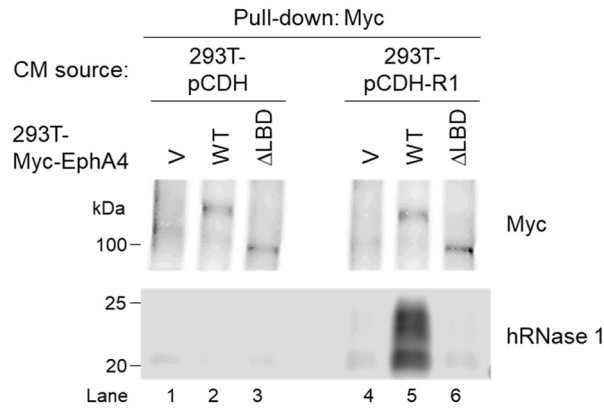

**Supplementary Fig. 8. The extracellular ligand-binding domain of EphA4 is critical for hRNase 1 binding.** *In vitro* binding assay of 293T stable transfectants with empty vector (V), Myc-tagged EphA4 containing wild-type (WT), and ligand-binding domain deletion (ΔLBD), incubated with CM collected from 293T stable transfectant expressing empty vector (293T-pCDH) or Flag-tagged hRNase 1 (293T-pCDH-R1). Data are representative of two independent experiments with similar results. Source data are provided as a Source Data file.

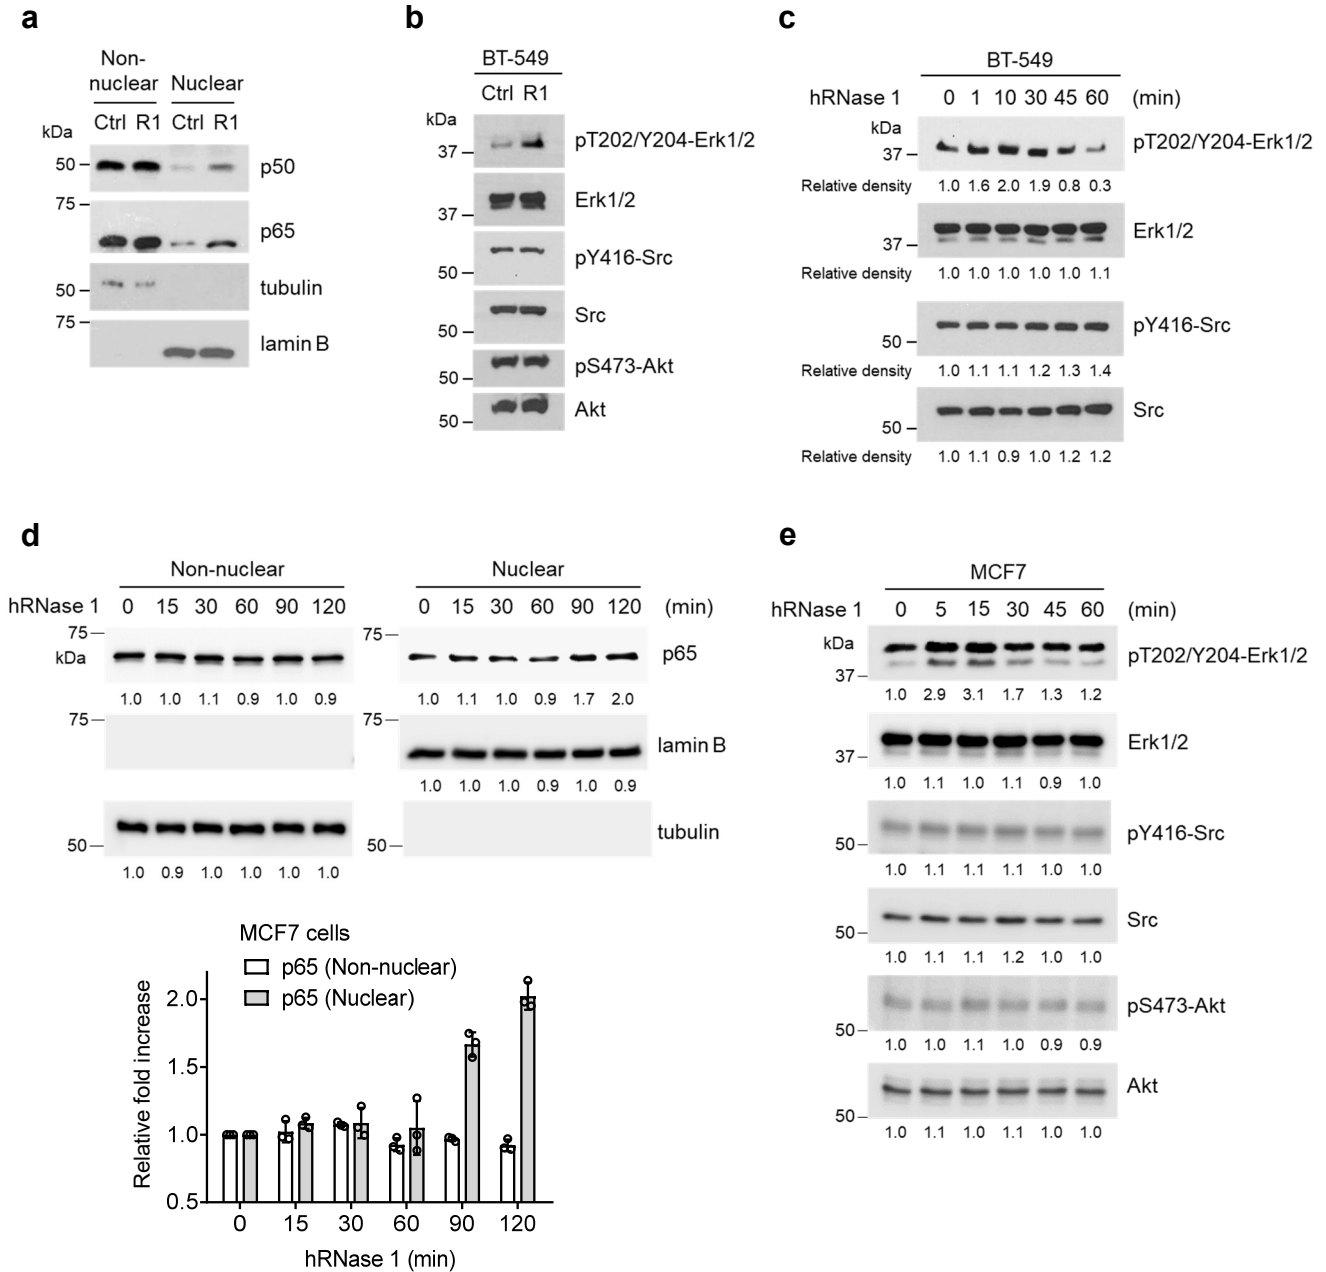

**Supplementary Fig. 9. hRNase 1 activates signaling pathways of NF- $\kappa$ B and Erk, but not Src**

**or Akt, in BT-549 and MCF7 cells. a**, Cellular fractionation of BT-549-Ctrl and BT-549-R1 stable clones, followed by WB with the indicated antibodies. Tubulin and lamin B were used as markers for the non-nuclear and nuclear portions, respectively. **b**, WB of BT-549-Ctrl and BT-549-R1 stable clones with the indicated antibodies. **c**, WB of BT-549 cells treated with



recombinant hRNase 1 protein purified from HEK293 cells (1  $\mu\text{g/ml}$ ) at various time points with the indicated antibodies. **d**, Top, cellular fractionation of MCF7 cells treated with hRNase 1 (1  $\mu\text{g/ml}$ ) at various time points, followed by WB with the indicated antibodies. Bottom, quantification of fold increase normalized against that at time 0 min. Error bars represent mean  $\pm$  SD, n = 2 independent experiments. **e**, WB of MCF7 cells treated with hRNase 1 (1  $\mu\text{g/ml}$ ) at various time points with the indicated antibodies. Relative density of signals were quantified using ImageJ. Data are representative of two (**a**) or three (**b**, **c**, **e**) independent experiments with similar results. Source data are provided as a Source Data file.

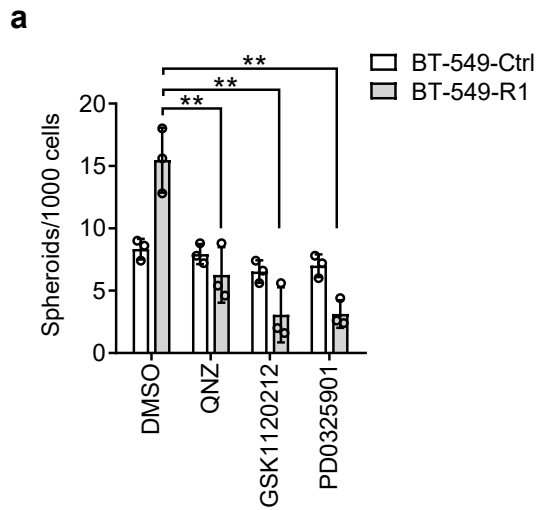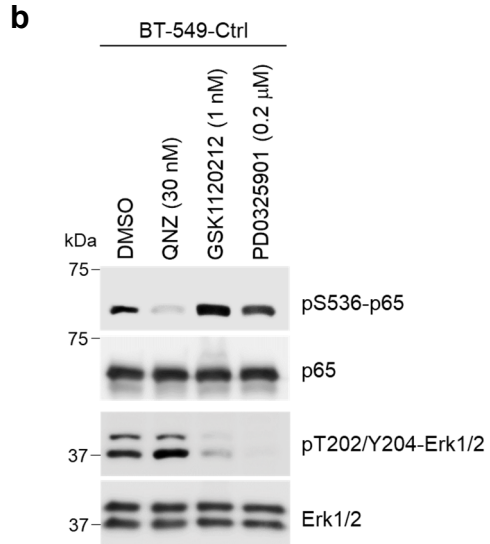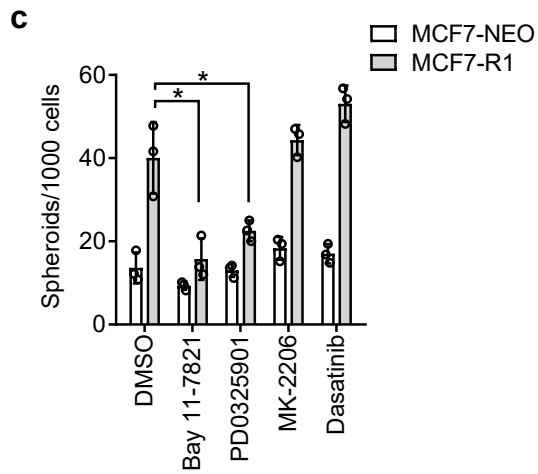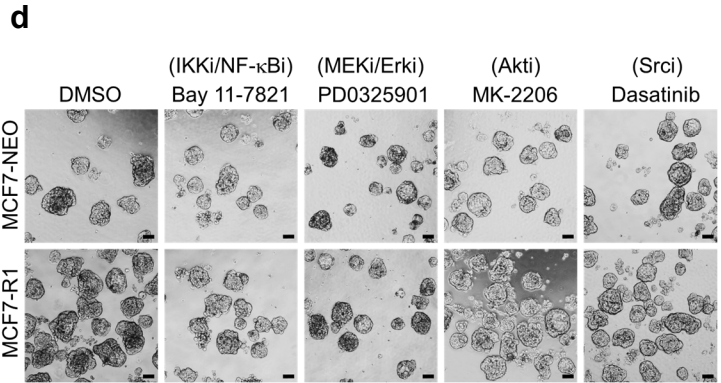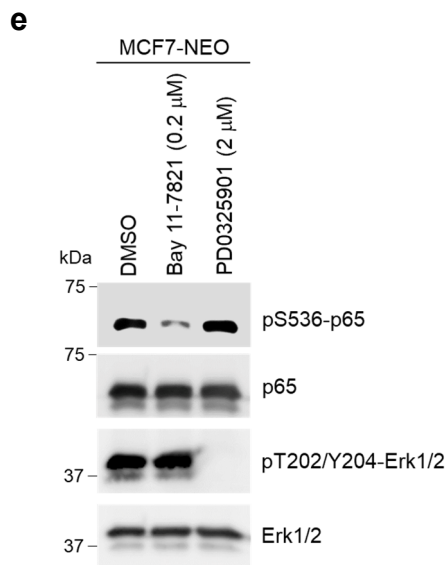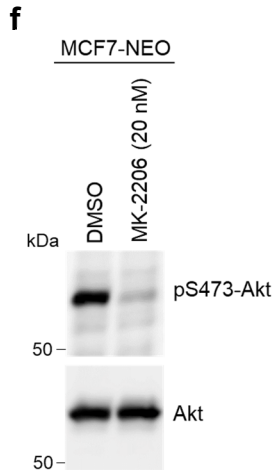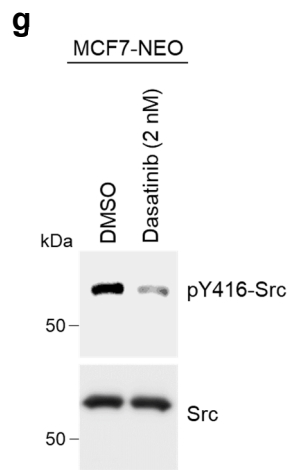

**Supplementary Fig. 10. hRNase 1 induces spheroid formation via the MEK/Erk and IKK/NF- $\kappa$ B activation pathways in BT-549 and MCF7 cells.** **a**, Quantification of spheroid formation assay in BT-549-Ctrl and BT-549-R1 stable clones incubated with the inhibitors against IKK/NF- $\kappa$ B (QNZ, 30 nM) and MEK/Erk (GSK1120212, 1 nM; PD0325901, 0.2  $\mu$ M). DMSO vs QNZ, \*\* $p = 0.0097$ , DMSO vs GSK1120212, \*\* $p = 0.0032$ , DMSO vs PD0325901,  $p = **0.0016$ . **b**, WB of BT-549-Ctrl cells treated with DMSO or various inhibitors for 1 day with the indicated antibodies. **c**, Quantification of spheroid formation assay in MCF7-NEO and MCF7-R1 stable clones incubated with the inhibitors against IKK/NF- $\kappa$ B (Bay 11-7821, 0.2  $\mu$ M), MEK/Erk (PD0325901, 2 nM), Akt (MK-2206, 20 nM), and Src (Dasatinib, 2 nM). DMSO vs Bay 11-7821, \* $p = 0.0133$ , DMSO vs PD0325901,  $p = *0.0275$ . **d**, Representative images of sphere formation assay from (c). Bar, 100  $\mu$ m. **e–g**, WB of MCF7-NEO cells treated with DMSO or various inhibitors for 1 day with the indicated antibodies. Error bars represent mean  $\pm$  SD. Data are representative of two (b, e–g) or three (a, c, d) independent experiments. \* $p < 0.05$ , \*\* $p < 0.01$ , two-tailed unpaired t test. Source data are provided as a Source Data file.

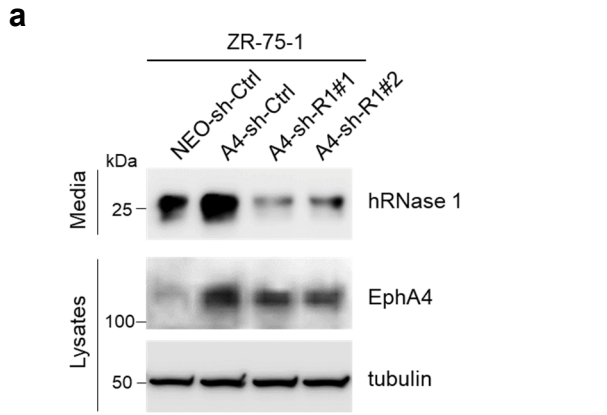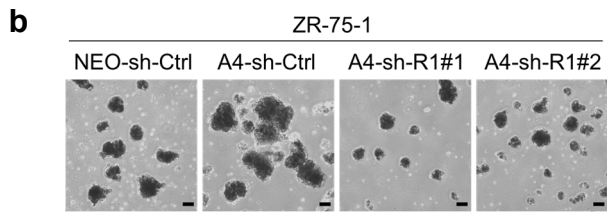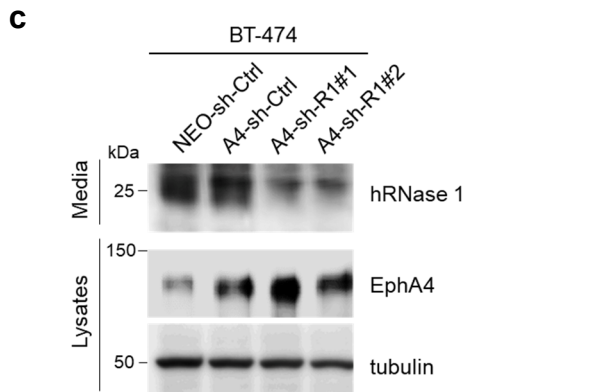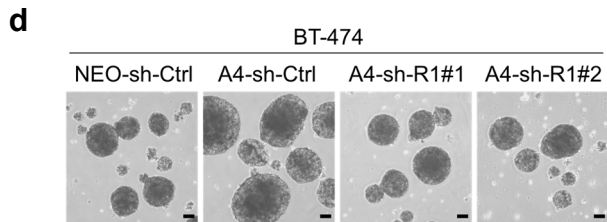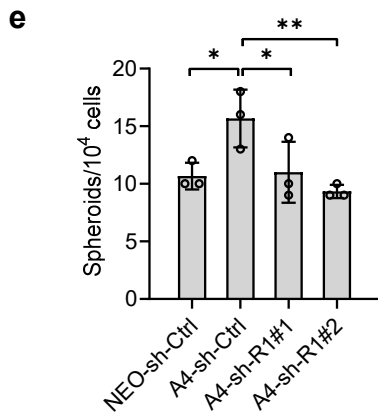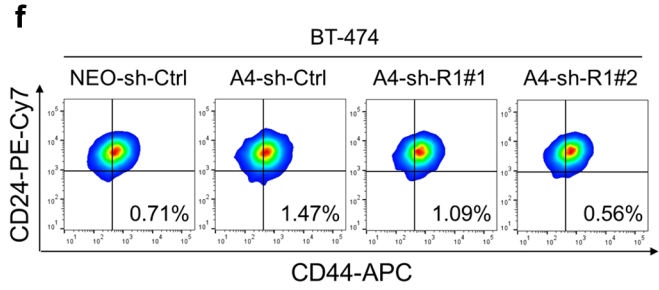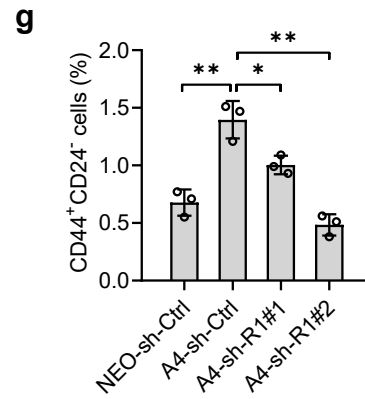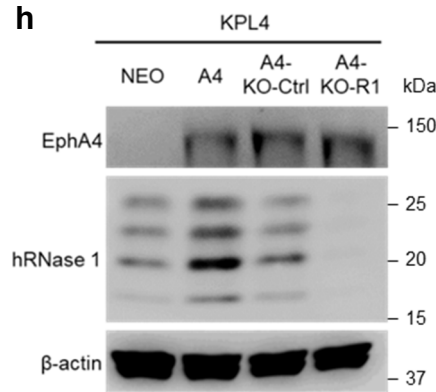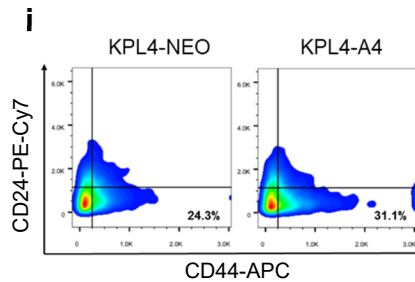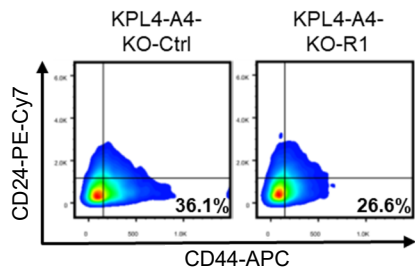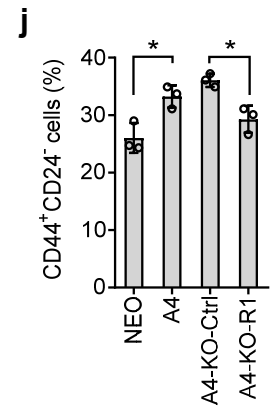

**Supplementary Fig. 11. Silencing hRNase 1 reduces EphA4-promoted spheroid formation and CD44<sup>+</sup>CD24<sup>-</sup> cell population.** **a**, WB of ZR-75-1 control cells (NEO-sh-Ctrl), ectopic EphA4 expressing ZR-75-1 cells (A4-sh-Ctrl), and ZR-75-1-A4 knockdown hRNase 1 cells (A4-sh-R1#1 and A4-sh-R1#2) blotted with EphA4 and hRNase 1 antibodies. **b**, Representative images of primary spheres of the indicated ZR-75-1 stable clones from (a). Bar, 100  $\mu$ m. **c**, WB of BT-474 control cells (NEO-sh-Ctrl), ectopic EphA4 expressing BT-474 cells (A4-sh-Ctrl), and BT-474-A4 knockdown hRNase 1 cells (A4-sh-R1#1 and A4-sh-R1#2) blotted with EphA4 and hRNase 1 antibodies. **d**, Representative images of primary spheres of the indicated BT-474 stable clones from (c). Bar, 100  $\mu$ m. **e**, Quantification of spheroid formation assay of the indicated BT-474 stable clones. One-tailed p values are shown. NEO-sh-Ctrl vs A4-sh-Ctrl, \*p = 0.0176, A4-sh-Ctrl vs A4-sh-R1#1, \*p = 0.0456, A4-sh-Ctrl vs A4-sh-R1#2, \*\*p = 0.0066. **f**, Flow cytometric analysis of membrane CD44 and CD24 expression of the indicated BT-474 stable clones. **g**, Quantification of flow cytometric analysis from (f). NEO-sh-Ctrl vs A4-sh-Ctrl, \*\*p = 0.0033, A4-sh-Ctrl vs A4-sh-R1#1, \*p = 0.0200, A4-sh-Ctrl vs A4-sh-R1#2, \*\*p = 0.0011. **h**, WB of EphA4 and hRNase 1 in KPL4 control cells (KPL4-NEO), ectopic EphA4 expressing KPL4 cells (KPL4-A4), and KPL4-A4 knockout hRNase 1 (KO-R1) or control (KO-Ctrl) cells. **i**, Flow cytometric analysis of membrane CD44 and CD24 expression in KPL4 cells as indicated. The percentages of CD44<sup>+</sup>CD24<sup>-</sup> cells are shown in the lower right quadrant of each panel. **j**, Quantification of flow cytometric analysis from (i). NEO vs A4, \*p = 0.0182, A4-KO-Ctrl vs A4-KO-R1, \*p = 0.0110. All error bars represent mean  $\pm$  SD. Data represent two (a, c, h) or three (b, d, e, g, j) independent experiments. \*p < 0.05, \*\*p < 0.01, unpaired t test, one-tailed (e) and two-tailed (g, j). Source data are provided as a Source Data file.

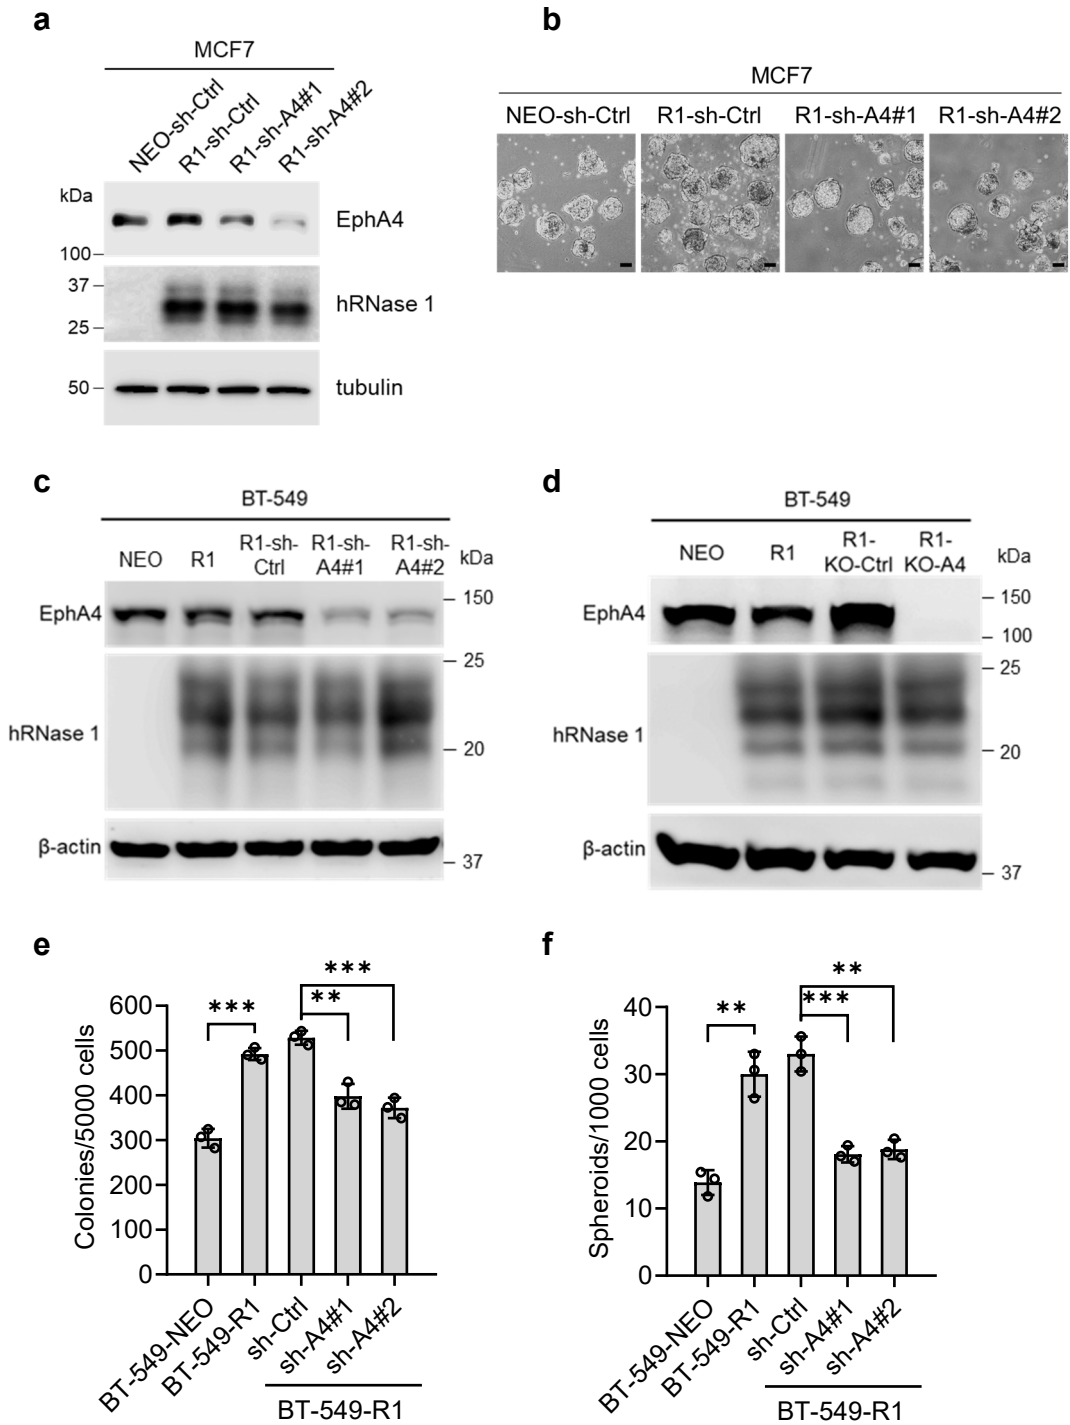

**Supplementary Fig. 12. Silencing EphA4 reduces hRNase 1-mediated spheroid formation. a,** WB of MCF7 control cells (NEO-sh-Ctrl), hRNase 1 expressing MCF7 cells (R1-sh-Ctrl), and MCF7-R1 knockdown EphA4 cells (R1-sh-A4#1 and R1-sh-A4#2) blotted with EphA4 and

hRNase 1 antibodies. **b**, Representative images of primary spheres of the indicated MCF7 stable clones from **(a)**. Bar, 100  $\mu$ m. **c**, WB of EphA4 and hRNase 1 in BT-549 control cells (BT-549-NEO), hRNase 1 expressing BT-549 cells (BT-549-R1), and BT-549-R1 transfected with shRNA of two different sequences against EphA4 (sh-A4#1 and sh-A4#2) or with scrambled control (sh-Ctrl). **d**, WB of EphA4 and hRNase 1 in BT-549-NEO, BT-549-R1, and BT-549-R1 knockout EphA4 (KO-A4) or control (KO-Ctrl) cells. **e**, Quantification of soft agar colony formation assay of the indicated BT-549 stable clones from **(c)**. NEO vs R1, \*\*\*p = 0.0002, R1-sh-Ctrl vs R1-sh-A4#1, \*\*p = 0.0021, R1-sh-Ctrl vs R1-sh-A4#2, \*\*\*p = 0.0006. **f**, Quantification of spheroid formation assay of the indicated BT-549 stable clones from **(c)**. NEO vs R1, \*\*p = 0.0019, R1-sh-Ctrl vs R1-sh-A4#1, \*\*\*p = 0.0008, R1-sh-Ctrl vs R1-sh-A4#2, \*\*p = 0.0012. The experiments were repeated once **(a, c, d)** and twice **(b)** with similar results. Data are representative of three independent experiments in triplicate **(e, f)**. All error bars represent mean  $\pm$  SD. \*\*p < 0.01, \*\*\*p < 0.001, two-tailed unpaired t test. Source data are provided as a Source Data file.

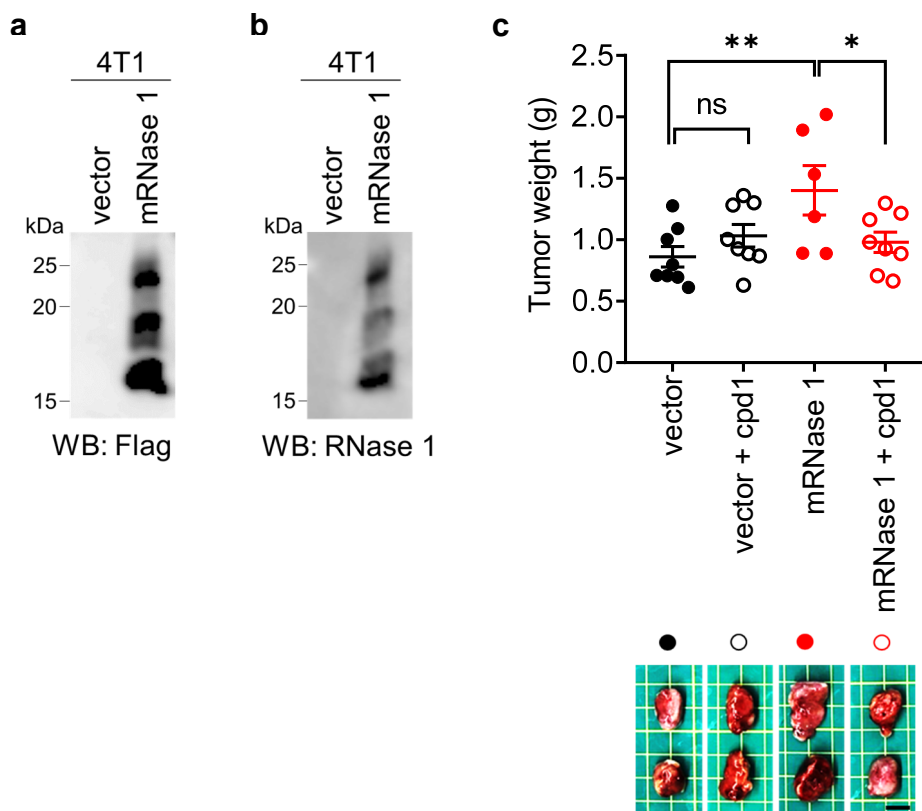

**Supplementary Fig. 13. RNase 1-EphA4 axis contributes to breast tumorigenesis.** **a** and **b**, WB analysis of mouse 4T1 mammary tumor cells expressing mouse RNase 1 (mRNase 1) and vector control blotted with antibodies against Flag (**a**) or RNase 1 (**b**; Santa Cruz Biotechnology, #sc-169198). The experiments were repeated an additional time with similar results. **c**, Tumor weight analysis (top) and representative images (bottom) of mice subcutaneously injected with the indicated 4T1 cells in (**a**) followed by treatment with solvent or compound 1 (cpd1). Bar, 1 cm.  $n = 8$  per group except for the mRNase 1 group ( $n = 6$ ). Vector vs mRNase 1,  $**p = 0.0089$ , mRNase 1 vs mRNase 1 + cpd1,  $*p = 0.0264$ . Error bars represent mean  $\pm$  SEM.  $*p < 0.05$ ,  $**p < 0.01$ , ns, not significant, one-tailed unpaired t test. Source data are provided as a Source Data file.



**a**

|          |       | phospho-EphA4 |      |       |
|----------|-------|---------------|------|-------|
|          |       | Low           | High | Total |
| hRNase 1 | Low   | 16            | 8    | 24    |
|          | High  | 4             | 20   | 24    |
|          | Total | 20            | 28   | 48    |

p = 0.0001

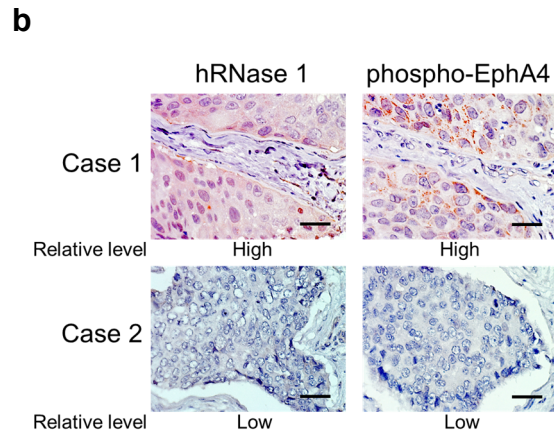

**Supplementary Fig. 14. Pathological relevance between hRNase 1 expression and EphA4 activation in breast cancer. a,** Quantification of IHC staining for the correlation between hRNase 1 and phospho-EphA4-Y779 using human breast tumor tissue microarray analysis (Pantomics Inc., #BRC961; Pearson Chi-Square test). **b,** Two representative cases of IHC staining from (a). The experiment was repeated a second time with similar results. Bar, 50  $\mu$ m.

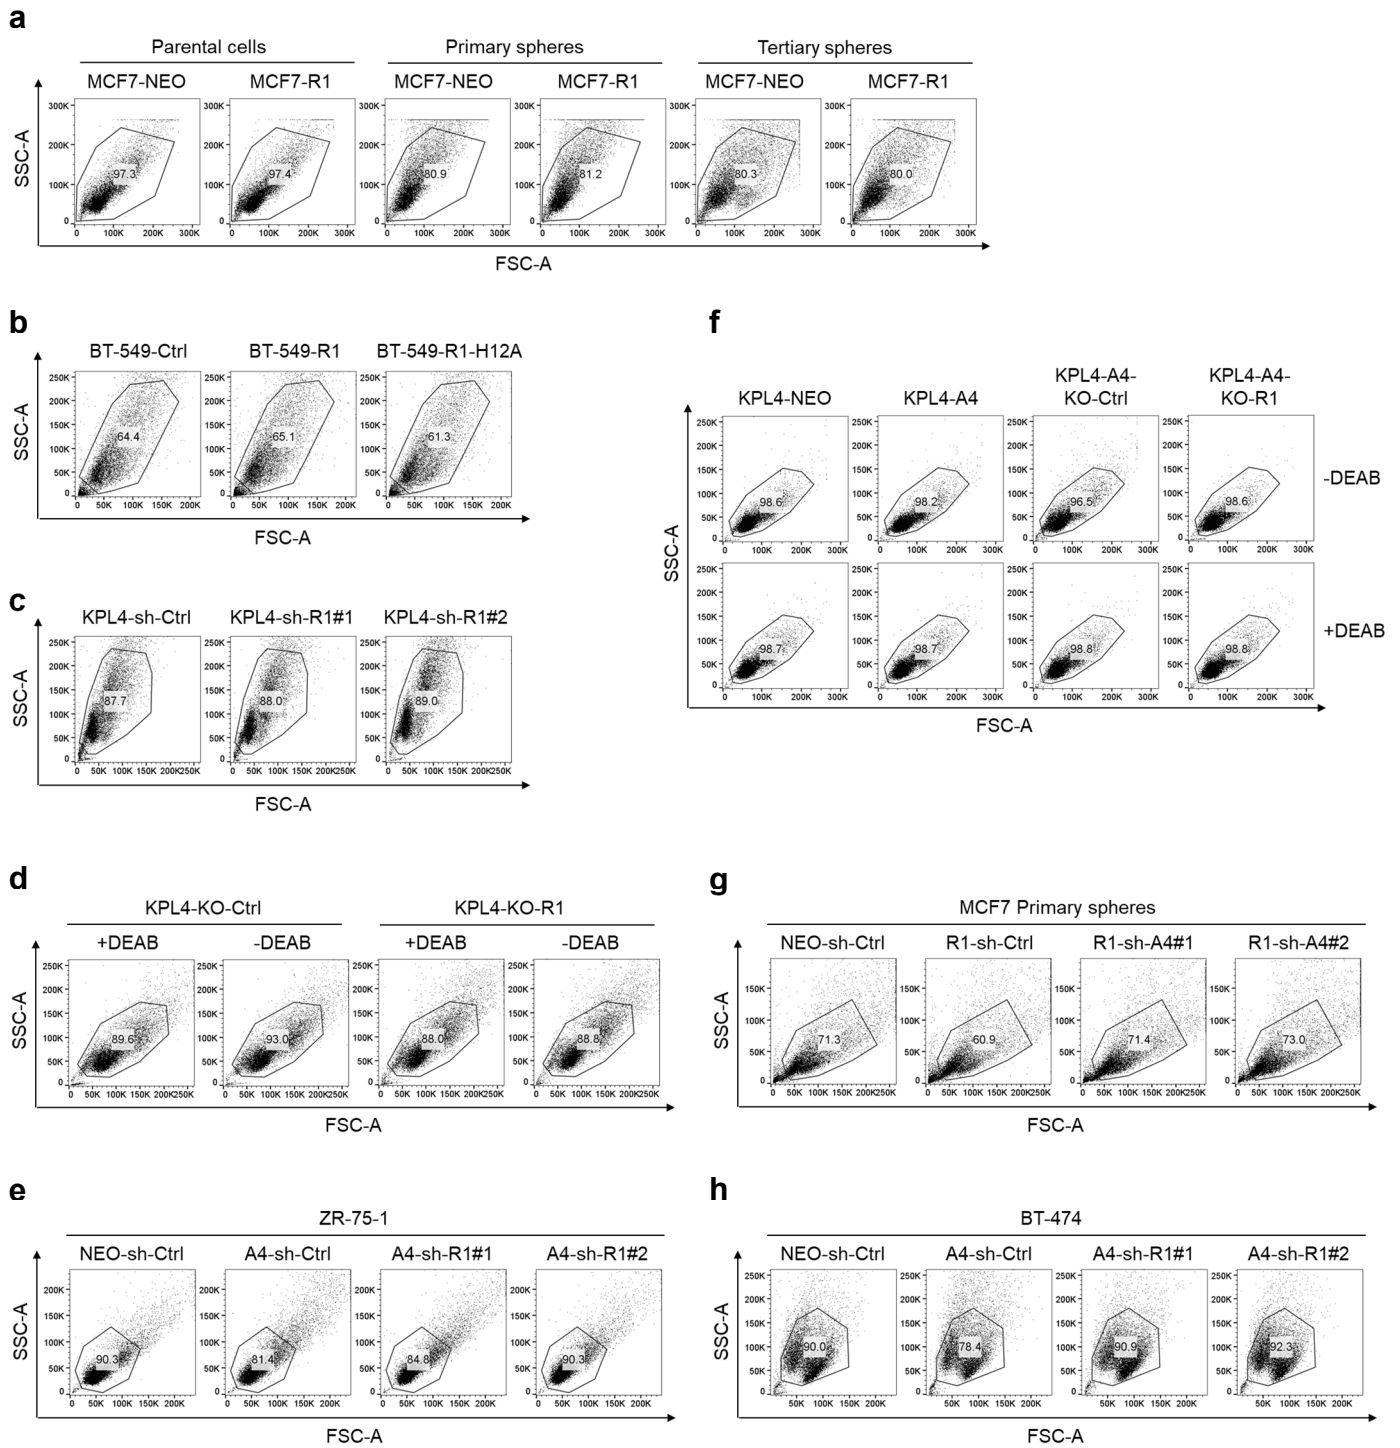

**Supplementary Fig. 15. Gating strategies based on FSC-A/SSC-A parameters used for flow cytometric analysis of CD24/CD44 expression and ALDEFLUOR assay. a, Gating strategy to**

determine the percentage of CD24<sup>-</sup>/CD44<sup>+</sup> cells in the indicated MCF7 stable clones (parental cells) and primary and tertiary spheres derived from the indicated MCF7 stable clones presented on Fig. 2c. **b**, Gating strategy to determine the percentage of CD24<sup>-</sup>/CD44<sup>+</sup> cells in BT-549 stable clones presented on Fig. 2f. **c**, Gating strategy to determine the percentage of CD24<sup>-</sup>/CD44<sup>+</sup> cells in KPL4 stable clones presented on Fig. 2i. **d**, Gating strategy to determine the percentage of ALDEFUOR-positive cells by ALDEFUOR assay presented on Fig. 2m. **e**, Gating strategy to determine the percentage of CD24<sup>-</sup>/CD44<sup>+</sup> cells in ZR-75-1 stable clones presented on Fig. 6b. **f**, Gating strategy to determine the percentage of ALDEFUOR-positive cells by ALDEFUOR assay presented on Fig. 6d. **g**, Gating strategy to determine the percentage of CD24<sup>-</sup>/CD44<sup>+</sup> cells in primary spheres derived from the indicated MCF7 stable clones presented on Fig. 6h. **h**, Gating strategy to determine the percentage of CD24<sup>-</sup>/CD44<sup>+</sup> cells in BT-474 stable clones presented on Supplementary Fig. 11f. Frequencies of cell population after gating are indicated in the gates.

**Supplementary Table 1. A list of oligonucleotide primers used in the study**

| <b>Name</b>                                                             | <b>Sequence</b>                                                |
|-------------------------------------------------------------------------|----------------------------------------------------------------|
| <i>For human RNase 1 cloning in pCDH-CMV-MCS-EF1 expression plasmid</i> |                                                                |
| pCDH-R1_F                                                               | ACGCGAATTCGCCACCATGGCTCTGGA                                    |
| pCDH-R1_R                                                               | ACGCGGATCCTCACTTGTCGTCATCGTCTTTGTAG<br>TCGGCGGTAGAGTCCTCCACAGA |
| <i>For human RNase 1 mutagenesis</i>                                    |                                                                |
| R1-H12A_F                                                               | GGCAGGCTATGGACTCAGACAGTTCCC                                    |
| R1-H12A_R                                                               | AGTCCATAGCCTGCCGCTGGAATTTCTTG                                  |
| <i>For shRNA targeting human RNase 1</i>                                |                                                                |
| sh-R1#1 (V3LHS_313141)                                                  | TACAGTAGGTGGAGCTGCT                                            |
| sh-R1#2 (V2LHS_32407)                                                   | TTGGTTACAGTAGGTGGAG                                            |
| <i>For shRNA targeting human EphA4</i>                                  |                                                                |
| sh-A4#1 (TRCN0000344511)                                                | CCGGGACTTGCAAGGAGACGTTTAACTCGAGTTA<br>AACGTCTCCTTGCAAGTCTTTTTG |
| sh-A4#2 (TRCN0000196950)                                                | CCGGGACTTGCAAGGAGACGTTTAACTCGAGTTA<br>AACGTCTCCTTGCAAGTCTTTTTG |
| <i>For knockout targeting human RNase 1 (KO-R1)</i>                     |                                                                |
| hRNase 1-1                                                              | TATTCGGGCGCCTCATCATT (271 to 293, – strand)                    |
| hRNase 1-2                                                              | CACCTTTGTGCACGAGCCCC (322 to 344, + strand)                    |
| hRNase 1-3                                                              | GTCTCTCCTTCGGGCTGGTC (481 to 503, – strand)                    |
| <i>For knockout targeting human EphA4 (KO-A4)</i>                       |                                                                |
| EphA4-1                                                                 | TGTGGGAAGTGATGTCGTAC (2551 to 2573, + strand)                  |
| EphA4-2                                                                 | GGCACCGGCGAACCATGGCT (97 to 119, + strand)                     |
| EphA4-3                                                                 | CGACGCTGTCACAGGTTCCA (161 to 183, + strand)                    |

**Supplementary Table 2. A list of primary antibodies used in the study**

| <b>Antibody</b>                                        | <b>Supplier</b>           | <b>Catalog No.</b> | <b>Appl.<sup>a</sup></b> | <b>Usage</b>        |
|--------------------------------------------------------|---------------------------|--------------------|--------------------------|---------------------|
| Anti-Human $\beta$ -Actin, clone AC-74                 | Sigma-Aldrich             | #A2228             | WB                       | 1:10,000            |
| Anti-Human Akt                                         | Cell Signaling Technology | #9272              | WB                       | 1:1,000             |
| Anti-Human Phospho-Akt (Ser473)                        | Cell Signaling Technology | #9271              | WB                       | 1:1,000             |
| PE-Cy <sup>TM</sup> 7 Mouse Anti-Human CD24, Clone ML5 | BD Biosciences            | #561646            | FC                       | 1:100               |
| APC Mouse Anti-Human CD44, Clone G44-26                | BD Biosciences            | #559942            | FC                       | 1:60                |
| Anti-Human CD133 [EPR20980-104]                        | Abcam                     | #ab216323          | IHC                      | 1:200               |
| Anti-Human Erk1/2                                      | EMD Millipore             | #06-182            | WB                       | 1:10,000            |
| Anti-Human Phospho-Erk1/2 (Thr202/Tyr204) (D13.14.4E)  | Cell Signaling Technology | #4370              | WB                       | 1:10,000            |
| Anti-Human EphA3 (D-2)                                 | Santa Cruz Biotechnology  | #sc-514209         | WB                       | 1:500               |
| Anti-Human EphA4 (N-terminal region), Clone M280       | ECM Biosciences           | #EM2801            | WB                       | 1:1,000             |
| Anti-Human EphA4 (S-20)                                | Santa Cruz Biotechnology  | #sc-921            | PLA<br>/IP               | 1:50<br>/4 $\mu$ g  |
| Anti-Human EphA4 (6H7)                                 | EMD Millipore             | #AP1173            | ELISA                    | 3 $\mu$ g/ml        |
| Anti-Human phospho-EphA4 (Y602)                        | ECM Biosciences           | #EP2731            | WB                       | 1:1,000             |
| Anti-Human phospho-EphA4 (Y779)                        | ECM Biosciences           | #EP2751            | WB                       | 1:1,000             |
| Anti-Human phospho-EphA4 (Y779/833)                    | LifeSpan BioSciences      | #LS-C381624        | IHC                      | 1:150               |
| Anti-Human EphA5 (L-15)                                | Santa Cruz Biotechnology  | #sc-1014           | WB<br>/IP                | 1:500<br>/6 $\mu$ g |
| Anti-Human Ephrin-A1 (40-120 aa, Internal)             | LifeSpan BioSciences      | #LS-C383378        | WB                       | 1:1,000             |
| Anti-Human Ephrin-A2 (C-Terminus)                      | LifeSpan BioSciences      | #LS-C352139        | WB                       | 1:1,000             |
| Anti-Human Ephrin-A3 [N1C3]                            | GeneTex                   | #GTX101455         | WB                       | 1:500               |
| Anti-Human Ephrin-A4                                   | R & D Systems             | #AF369             | WB                       | 1:1,000             |
| Anti-Human Ephrin-A5                                   | R & D Systems             | #AF3743            | WB                       | 1:1,000             |

|                                                     |                           |             |            |                   |
|-----------------------------------------------------|---------------------------|-------------|------------|-------------------|
| Anti-Human Ephrin-A5 (Biotin, aa21-203)             | LifeSpan BioSciences      | #LS-C688235 | ELISA      | 1:500             |
| Anti-Human Ephrin-B1                                | Proteintech               | #12999-1-AP | WB         | 1:1,000           |
| Anti-Human Ephrin-B2 [N1C1]                         | GeneTex                   | #GTX105582  | WB         | 1:1,000           |
| Anti-Human Ephrin-B3                                | R & D Systems             | #MAB395     | WB         | 1:500             |
| Monoclonal ANTI-FLAG® M2 antibody produced in mouse | Sigma-Aldrich             | #F3165      | WB<br>/PLA | 1:3,000<br>/1:100 |
| Anti-GST (91G1)                                     | Cell Signaling Technology | #2625       | WB         | 1:3,000           |
| Anti-Myc Tag, clone 4A6                             | EMD Millipore             | #05-724     | WB         | 1:3,000           |
| Anti-Human p50 (E-10)                               | Santa Cruz Biotechnology  | #sc-8414    | WB         | 1:1,000           |
| Anti-Human p65 (D14E12)                             | Cell Signaling Technology | #8242       | WB         | 1:1,000           |
| Anti-Human Phospho-p65 (S536) (93H1)                | Cell Signaling Technology | #3033       | WB         | 1:1,000           |
| Anti-Human PLCγ1                                    | Cell Signaling Technology | #2822       | WB         | 1:1,000           |
| Anti-Human Phospho-PLCγ1 (Y783)                     | Sigma-Aldrich             | #SAB4503827 | WB         | 1:1,000           |
| Anti-Human RNase1                                   | Sigma-Aldrich             | #HPA001140  | WB<br>/IHC | 1:1,000<br>/1:100 |
| Anti-Human RNase1 (Biotin, aa29-156)                | LifeSpan BioSciences      | #LS-C299825 | ELISA      | 1:500             |
| Anti-Mouse RNase 1 (T-12)                           | Santa Cruz Biotechnology  | #sc-169198  | WB         | 1:1,000           |
| Anti-Human Src (36D10)                              | Cell Signaling Technology | #2109       | WB         | 1:1,000           |
| Anti-Human Phospho-Src Family (Tyr416) (D49G4)      | Cell Signaling Technology | #6943       | WB         | 1:1,000           |
| Anti-Human Tubulin, clone B-5-1-2                   | Sigma-Aldrich             | #T5168      | WB         | 1:10,000          |

<sup>a</sup>ELISA, Enzyme-Linked Immunosorbent Assay; FC, Flow Cytometry; IHC, Immunohistochemistry; IP, Immunoprecipitation; PLA, Proximity Ligation Assay; WB, Western Blotting.
